# Supplementary material for: Prediction of treatment response in rheumatoid arthritis patients using genome‐wide SNP data
Source: PubMed Central journal article supplement (PMC6334178; doi:10.1002/gepi.22159), 2018-10-12
Supplement: GEPI-42-754-s004.pdf [file GEPI-42-754-s004.pdf]

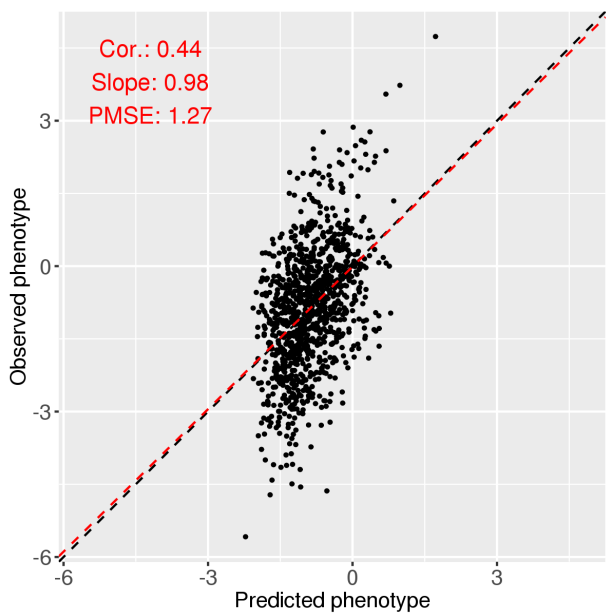

(a)

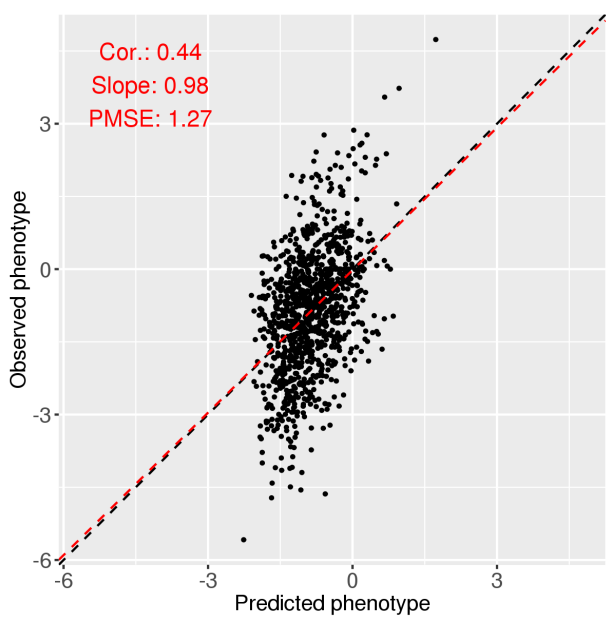

(b)

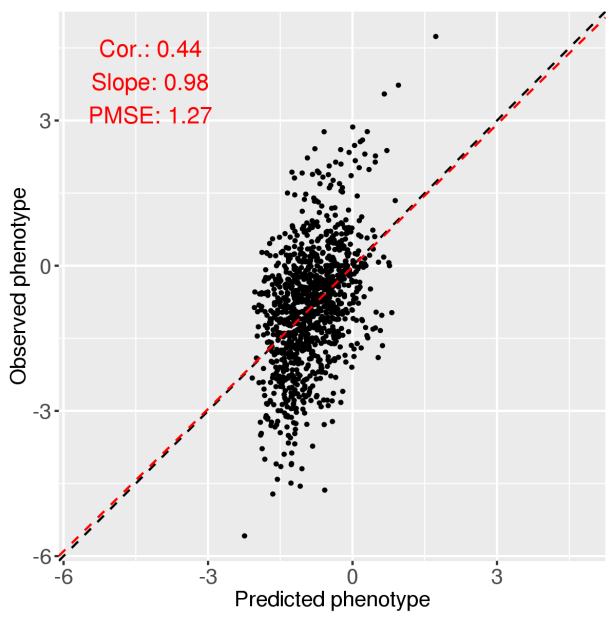

(c)
