# Supplementary material for: Prediction of treatment response in rheumatoid arthritis patients using genome‐wide SNP data
Source: PubMed Central journal article supplement (PMC6334178; doi:10.1002/gepi.22159), 2018-10-12
Supplement: GEPI-42-754-s005.pdf [file GEPI-42-754-s005.pdf]

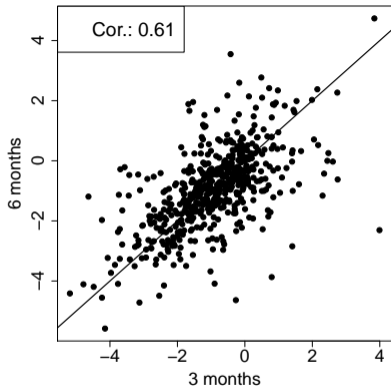

(a) anti-TNF (CRP)

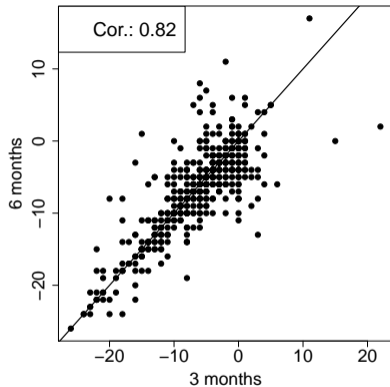

(b) anti-TNF (SJC28)

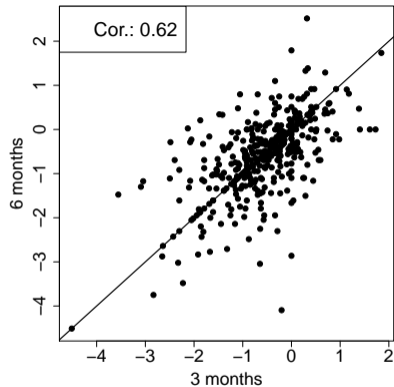

(c) anti-TNF (ESR)
