# Supplementary material for: Prediction of treatment response in rheumatoid arthritis patients using genome‐wide SNP data
Source: PubMed Central journal article supplement (PMC6334178; doi:10.1002/gepi.22159), 2018-10-12
Supplement: GEPI-42-754-s006.pdf [file GEPI-42-754-s006.pdf]

| Data Set            | GCTA-SC<br>Estimated $h^2$<br>(SE) | GCTA-MS<br>Estimated $h^2$<br>(SE) | GCTA-LD<br>Estimated $h^2$<br>(SE) | LDSC<br>Estimated $h^2$<br>(SE) | LDAK<br>Estimated $h^2$<br>(SE) | Bayesian<br>Posterior mode of $h^2$<br>(90% HDI) |
|---------------------|------------------------------------|------------------------------------|------------------------------------|---------------------------------|---------------------------------|--------------------------------------------------|
| Anti-TNF<br>(CRP)   | 0 (0.247)                          | 0.066 (0.279)                      | 0 (0.288)                          | 0.206 (0.433)                   | 0.024 (0.378)                   | 0.048 (0.001 - 0.313)                            |
| Anti-TNF<br>(SJC28) | 0 (0.151)                          | 0.09 (0.166)                       | 0.097 (0.186)                      | 0 (0.281)                       | 0.255 (0.232)                   | 0.053 (0.001 - 0.228)                            |
| Anti-TNF<br>(ESR)   | 0.462 (0.173)                      | 0.413 (0.176)                      | 0.647 (0.206)                      | 0.405 (0.326)                   | 0.534 (0.269)                   | 0.466 (0.288 - 0.781)                            |
| MTX<br>(CRP)        | 0 (0.469)                          | *                                  | *                                  | 0.245 (0.891)                   | 0.187 (0.678)                   | 0.091 (0.0001 - 0.571)                           |
| MTX<br>(SJC28)      | 0 (0.45)                           | *                                  | *                                  | 0 (0.886)                       | 0 (0.657)                       | 0.053 (0.00009 - 0.4)                            |
